# Supplementary material for: Evaluation of Increasing Dietary Concentrations of a Multi-Enzyme Complex in Feedlot Lambs’ Rations
Source: MDPI journal article supplement (doi:10.3390/ani14081215), 2024-04-18
Supplement: s1 [file s1]

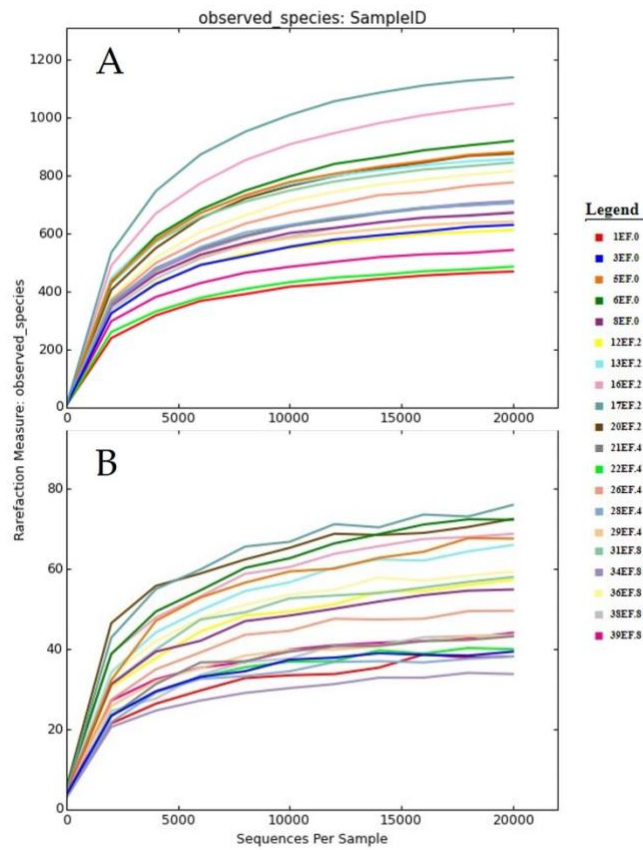

**Figure S1.** Rarefaction curve of observed species number at ASV-level of (A) bacterial/archaeal and (B) eukaryotic (fungi/protozoan) diversity
